# Supplementary material for: Granulocyte macrophage colony-stimulating factor predicts postoperative recurrence of clear-cell renal cell carcinoma
Source: PubMed Central journal article supplement (PMC5029719; doi:10.18632/oncotarget.8235), 2016-03-21
Supplement: oncotarget-07-24527-s001.pdf [file oncotarget-07-24527-s001.pdf]

SUPPLEMENTARY FIGURE

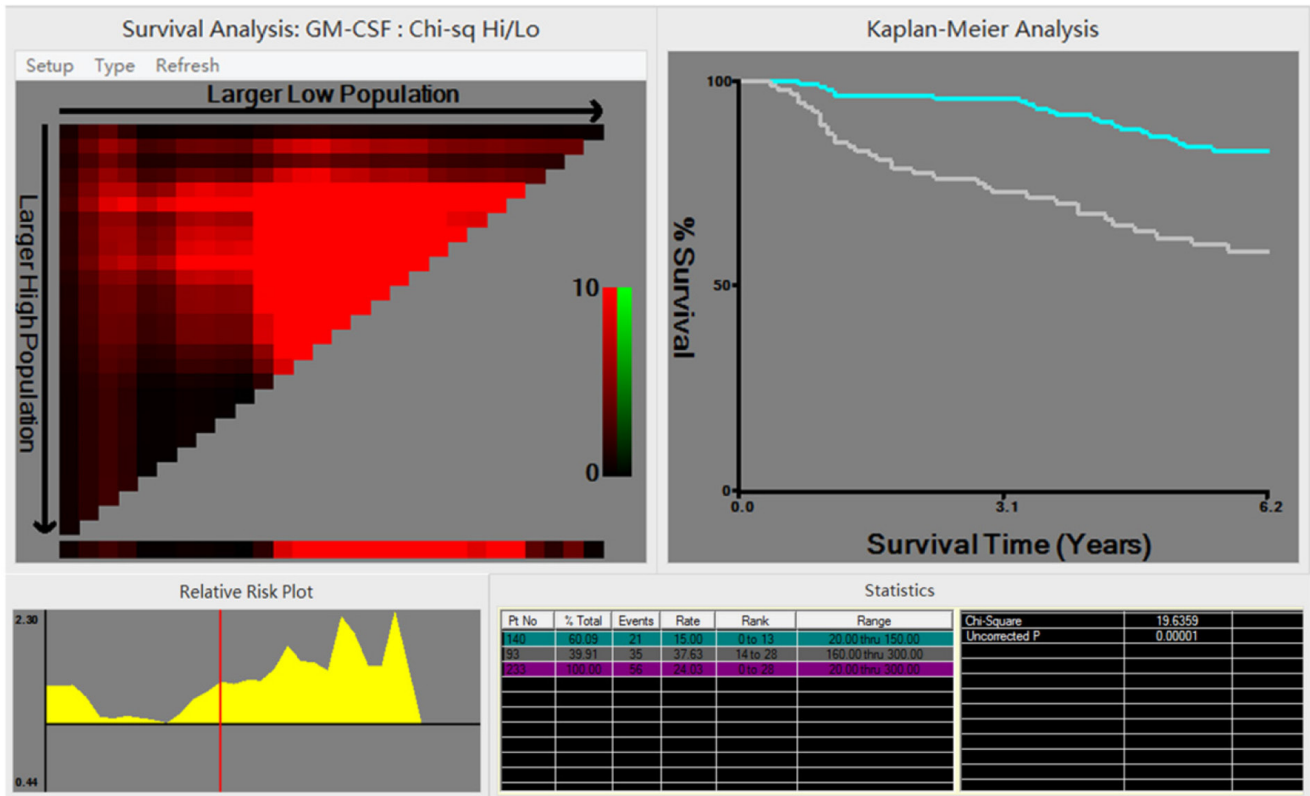

Supplementary Figure S1: The optimal cutoff value for the intratumoral GM-CSF expression was selected by X-tile 3.6.1 software (Yale University School of Medicine, New Haven, CT, USA).
